# Supplementary material for: Fe, N-doped carbon spheres prepared by electrospinning method as high efficiency oxygen reduction catalyst
Source: Royal Society of Chemistry journal article supplement (doi:10.1039/c9ra08951a), 2020-01-01
Supplement: c9ra08951a1.pdf [file c9ra08951a1.pdf]

Electronic Supplementary Material (ESI) for RSC Advances.  
This journal is © The Royal Society of Chemistry 2019

### Supporting Information

## Fe, N-doped carbon spheres prepared by electrospinning method as high-efficiency oxygen reduction reaction catalysts

Hanzeng Zou<sup>a</sup>, Supeng Pei<sup>a,\*</sup>, Zongshang Zhou<sup>a</sup>, Zhaoyan Chen<sup>a</sup>, Xia Xiong<sup>a</sup>, Yueyang Sun<sup>a</sup>, Yongming Zhang<sup>b</sup>

<sup>1</sup>School of Chemical and Environmental Engineering, Shanghai Institute of Technology, Shanghai 201418, China, E-mail: peisupeng@126.com

<sup>2</sup>School of Chemical Engineering and Technology, Shanghai Jiaotong University, Shanghai 200240, China

### Contents

Table S1 Elemental content of the Fe-N/MCS catalysts

| Samples      | C(wt. %) | O(wt.%) | N(wt. %) | Fe(wt.%) |
|--------------|----------|---------|----------|----------|
| Fe-N/MCS-181 | 83.62    | 7.66    | 8.59     | 0.13     |
| Fe-N/MCS-121 | 84.90    | 6.68    | 8.32     | 0.10     |
| Fe-N/MCS-158 | 86.72    | 5.87    | 7.30     | 0.11     |
| Fe-N/MCS-83  | 85.82    | 5.47    | 8.65     | 0.05     |

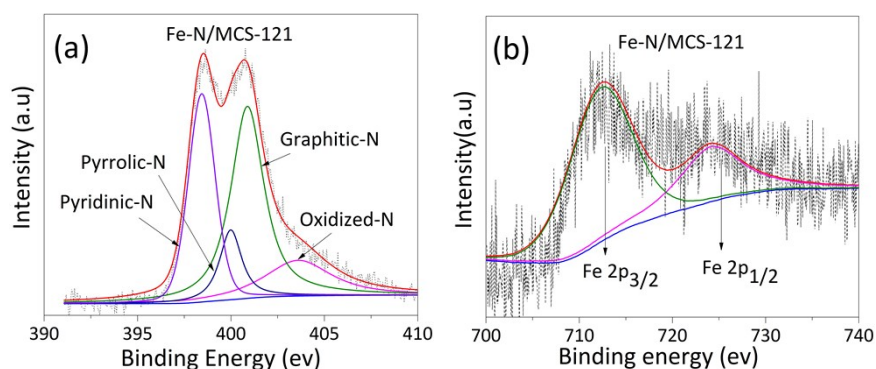

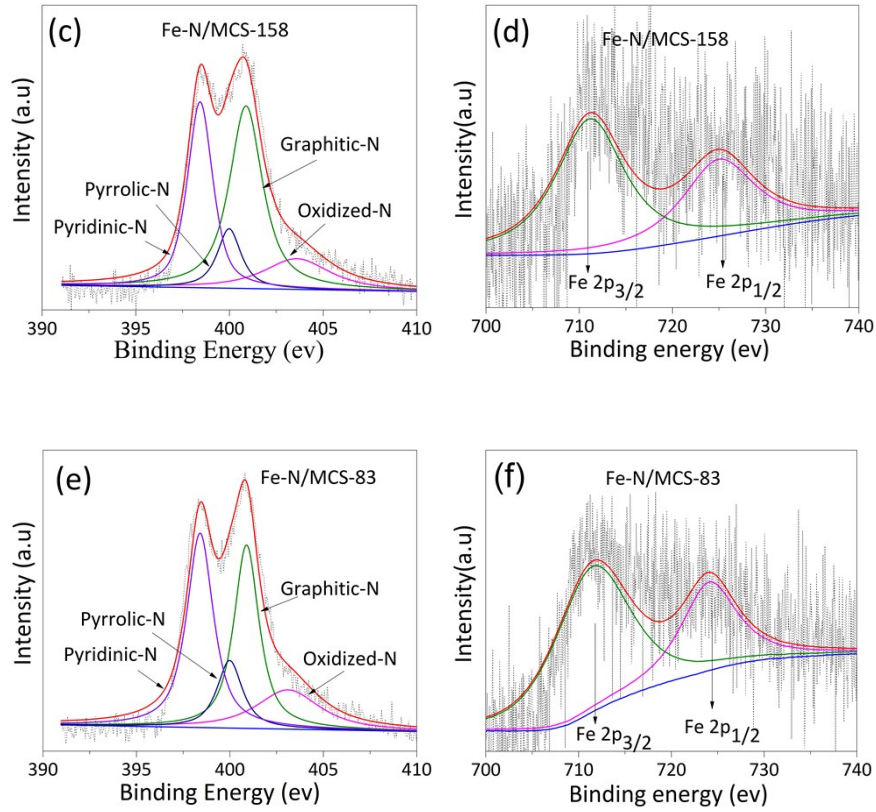

Fig S1. XPS results of N1s and Fe2p of Fe-N/MCS-121(a, b), Fe-N/MCS-158(c, d), Fe-N/MCS-83(e, f)

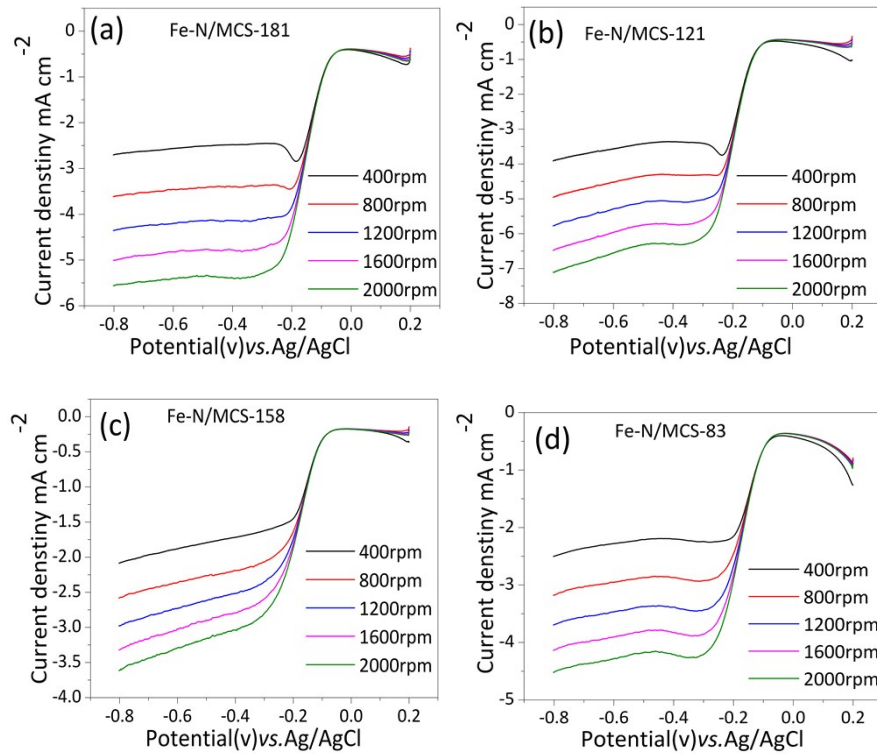

Fig S2. LSV results of Fe-N/MCS-181(a), Fe-N/MCS-121(b), Fe-N/MCS-158(c) and Fe-N/MCS-83(d)

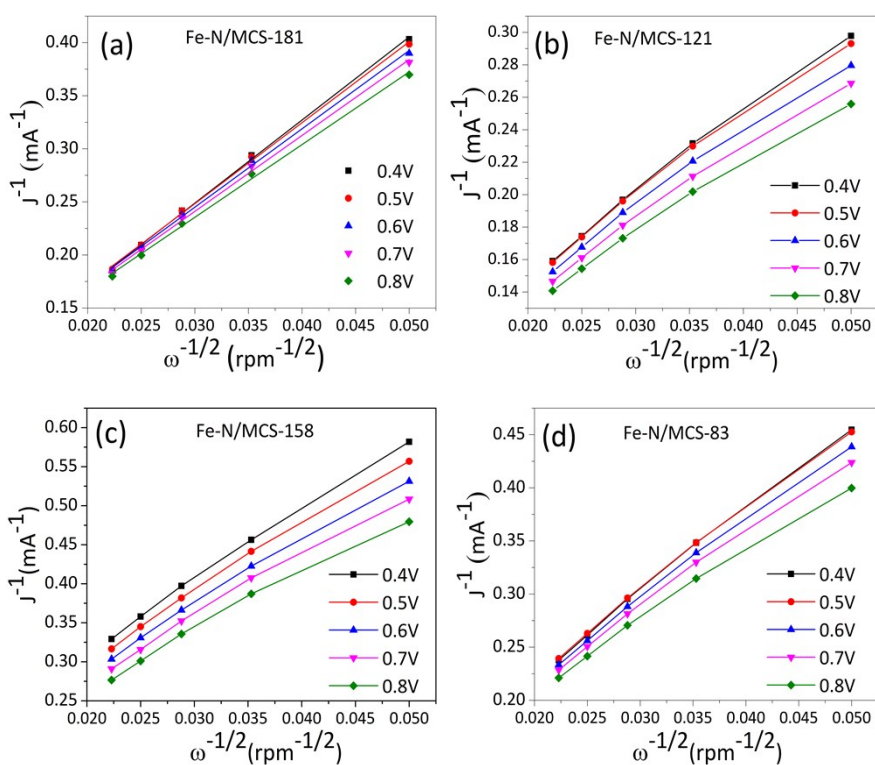

Fig S3. K-L plots of Fe-N/MCS-181(a), Fe-N/MCS-121(b), Fe-N/MCS-158(c) and Fe-N/MCS-83(d)

Table S2 Electrochemical performances comparison of the Fe-N/MCS catalysts and Pt/C

| Samples      | Onset potential (V vs. Ag/AgCl) | Half-wave potential (V vs. Ag/AgCl) | Current density (mA cm $^{-2}$ ) | Electron transfer number n |
|--------------|---------------------------------|-------------------------------------|----------------------------------|----------------------------|
| Fe-N/MCS-181 | -0.018                          | -0.145                              | 5.0                              | 4.0                        |
| Fe-N/MCS-121 | -0.051                          | -0.212                              | 6.5                              | 4.0                        |
| Fe-N/MCS-158 | -0.049                          | -0.180                              | 3.2                              | 3.5                        |
| Fe-N/MCS-83  | -0.039                          | -0.164                              | 4.0                              | 3.8                        |
| Pt/C         | -0.010                          | -0.180                              | 6.0                              | 4.0                        |

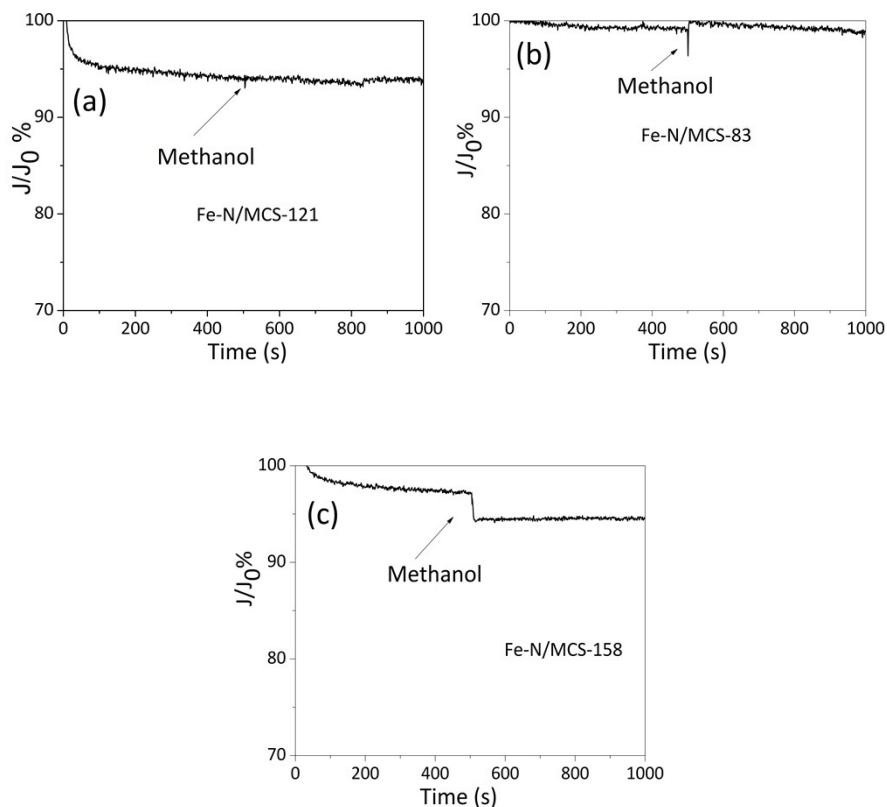

Fig S4. Chronoamperometric responses of Fe-N/MCS-121(a), Fe-N/MCS-158(b) and Fe-N/MCS-83(c) with 3 M methanol

Table S3 Comparison of alkaline ORR performance between Fe-N/MCS-181 and other non-noble metal catalysts from recent literature (electrode 1600 rpm in 0.1 M KOH)

| Samples                                        | Onset potential (V vs. Ag/AgCl) | Half-wave potential (V vs. Ag/AgCl) | References |
|------------------------------------------------|---------------------------------|-------------------------------------|------------|
| Fe-N/MCS-181                                   | -0.018 (0.959 RHE) <sup>a</sup> | -0.145 (0.832 RHE)                  | This work  |
| Ti <sub>0.8</sub> Co <sub>0.2</sub> N          | 0.98 (RHE)                      | 0.85 (RHE)                          | Ref 1      |
| Co-N-CNF-900                                   | -0.082                          | -0.155                              | Ref 2      |
| S-Fe/N/C                                       | 0.911(RHE)                      | 0.799 (RHE)                         | Ref 3      |
| AA-Fe <sub>2</sub> N@NC                        | -0.073                          | -0.172                              | Ref 4      |
| Fe/Fe <sub>2</sub> O <sub>3</sub> @Fe-N-C-1000 | -0.04                           | -0.17                               | Ref 5      |

<sup>a</sup>Following Ag/AgCl potential of Fe-N/MCS-181 is converted to RHE using following Nernst equation.  $E \text{ (vs. RHE)} = E_{\text{Ag/AgCl}} + \text{pH} \times 0.059 + 0.210$

### Notes and References

1. X. L. Tian, L. Wang, B. Chi, Y. Xu, S. Zaman, K. Qi, H. Liu, S. Liao, B. Y. Xia, *ACS Catal.* 2018, **8**, 8970–8975.
2. L. Shang, H. Yu, X. Huang, T. Bian, R. Shi, Y. Zhao, G. I. Waterhouse, L. Wu, C. Tung, T. Zhang, *Adv. Mater.*, 2016, **28**, 1668-1674.
3. K. Hu, L. Tao, D. Liu, J. Huo, S. Wang, *ACS Appl. Mater. Interfaces*, 2016, **8**, 19379-19385.
4. A. Zhu, L. Qiao, P. Tan, Y. Ma, W. Zeng, R. Dong, C. Ma, J. Pan, *Appl. Catal. B: Environ.*, 2019, **254**, 601-611.
5. Y. Zang, H. Zhang, X. Zhang, R. Liu, S. Liu, G. Wang, Y. Zhang, H. Zhao, *Nano Res.*, 2016,**9**, 2123-2137.
